# Supplementary material for: A facile metal–phenolic–amine strategy for dual-functionalization of blood-contacting devices with antibacterial and anticoagulant properties
Source: Royal Society of Chemistry journal article supplement (doi:10.1039/c8qm00458g), 2018-12-12
Supplement: c8qm00458g1.pdf [file c8qm00458g1.pdf]

Supporting Information

**A facile metal-phenolic-amine strategy for dual-functionalization of blood-contacting devices with antibacterial and anticoagulant properties†**

Qiufen Tu,<sup>‡a</sup> Xuehong Shen,<sup>‡a</sup> Yaowen Liu,<sup>b</sup> Qiang Zhang,<sup>c</sup> Xin Zhao,<sup>c</sup> Manfred F. Maitz,<sup>d</sup> Tao Liu,<sup>e</sup> Hua Qiu,<sup>a</sup> Jin Wang, Nan Huang,<sup>\*a</sup> and Zhilu Yang,<sup>\*a</sup>

<sup>a</sup>Key Lab. of Advanced Technology for Materials of Education Ministry, School of Materials, Southwest Jiaotong University, Chengdu, 610031, China.

E-mail: huangnan1956@163.com; zhiluyang1029@swjtu.edu.cn

<sup>b</sup>Department of Biomedical Engineering, The Hong Kong Polytechnic University, Hung Hom, Kowloon, Hong Kong SAR, China

<sup>c</sup>College of Food Science, Sichuan Agricultural University, Yaan, 625014, China,

<sup>d</sup>Max Bergmann Center of Biomaterials, Leibniz Institute of Polymer Research Dresden, Hohe Strasse 6, 01069 Dresden, Germany

<sup>e</sup>Medical College of Acu-Moxi and Rehabilitation, Guangzhou University of Chinese Medicine, Guangzhou 510006, China

<sup>†</sup>Electronic supplementary information (ESI) available. See DOI: XXX

<sup>‡</sup> Qiufen Tu and Xuehong Shen contributed equally to this work.

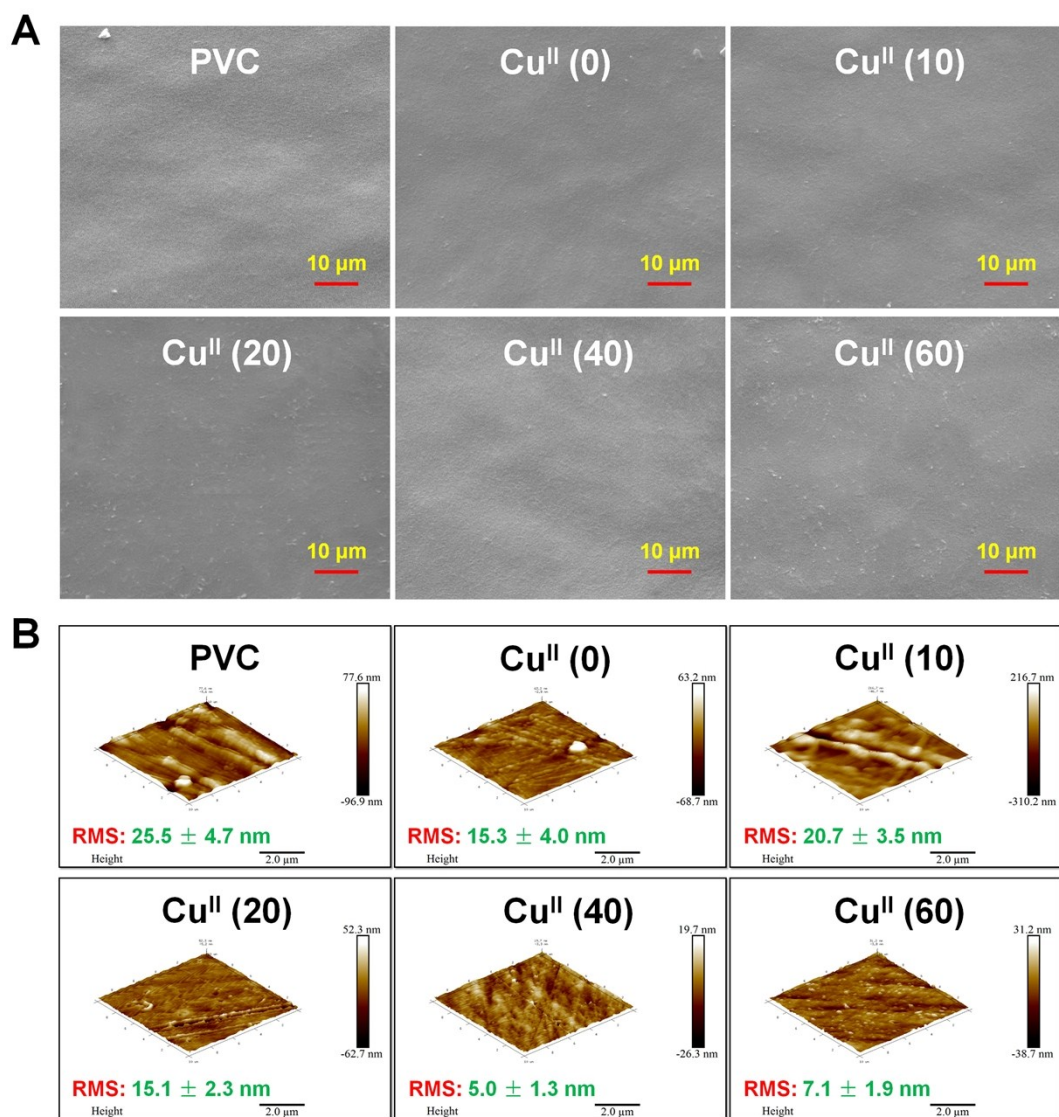

**Fig. S1.** SEM (A) and AFM (B) of the PVC before and after modification via  $\text{Cu}^{\text{II}}$ -GA coatings.

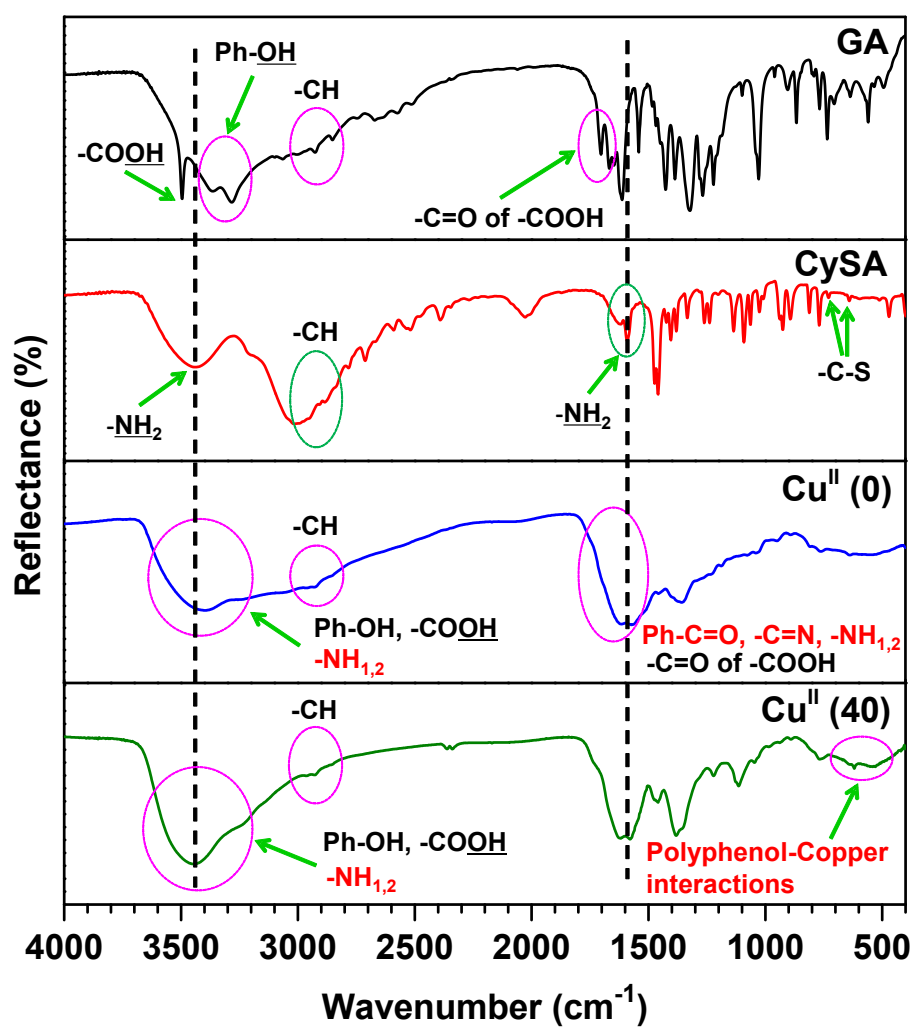

**Fig. S2.** IR spectra of GA, CySA,  $\text{Cu}^{\text{II}}(0)$ -GA/CySA and  $\text{Cu}^{\text{II}}(40)$ -GA polymers.

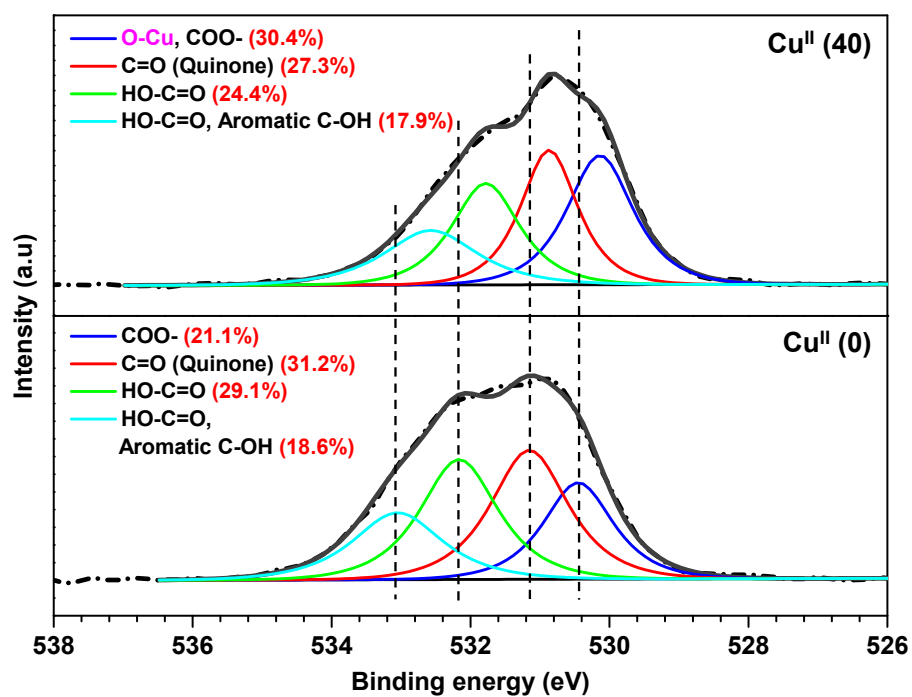

**Fig. S3.** High-resolution O1s spectra of Cu<sup>II</sup>(0) and Cu<sup>II</sup>(40) coatings.

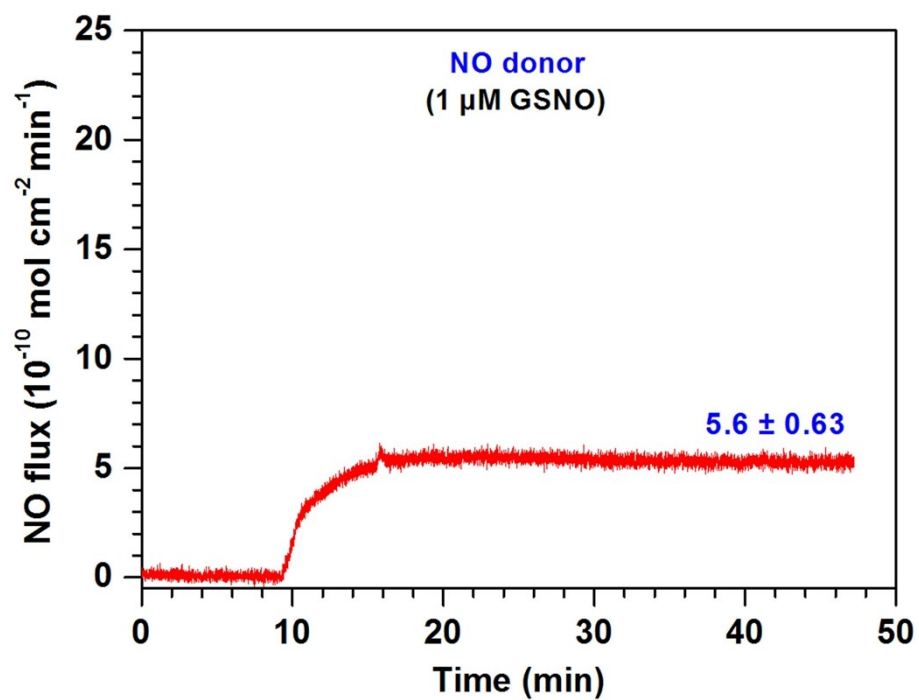

**Fig. S4.** Catalytic NO generation patterns induced by  $\text{Cu}^{\text{II}}(40)$  coating prepared using  $40 \mu\text{g/mL}$  feed concentrations of  $\text{CuCl}_2 \cdot 2\text{H}_2\text{O}$  in PBS (pH 7.4) containing NO donor consisting of  $1 \mu\text{M}$  GSNO and  $1 \mu\text{M}$  GSH.

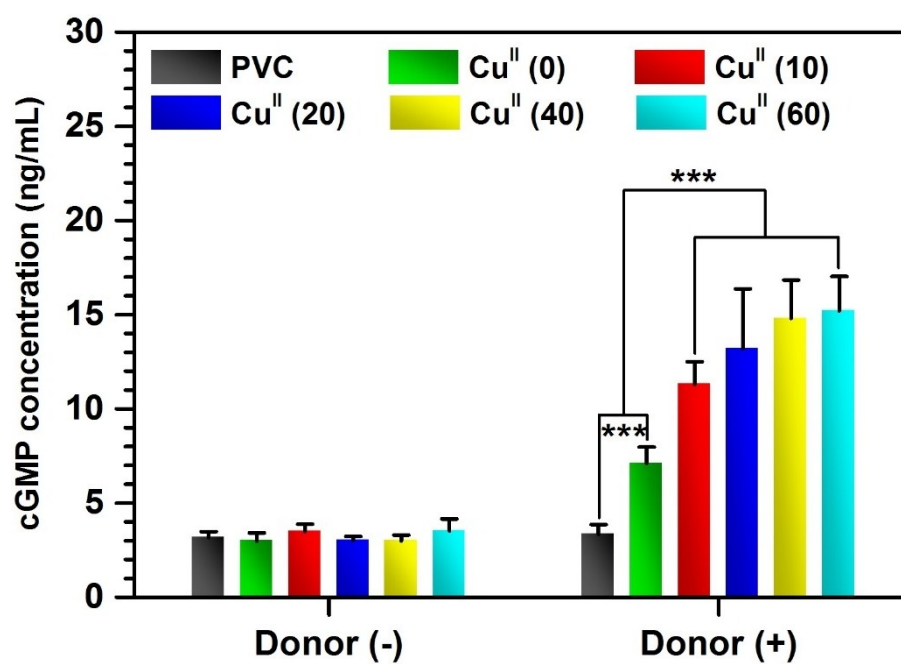

**Fig. S5.** The concentration of cGMP synthesized by platelets incubated with uncoated and Cu<sup>II</sup>-GA/CySA coated PVC for 2 hours. Data presented as mean  $\pm$  SD (n=4) and analyzed using a one-way ANOVA, \*\*\*p < 0.001.

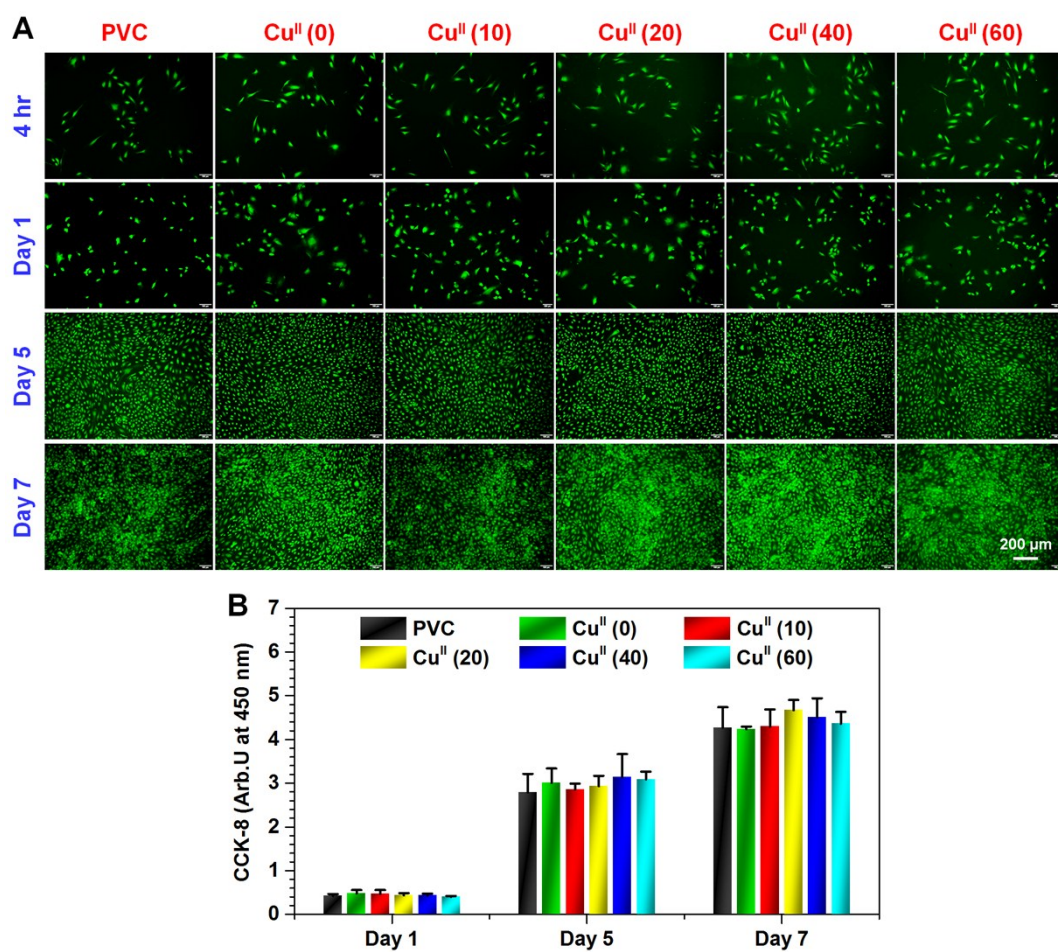

**Fig. S6.** (A) Fluorescence staining and (B) proliferation analysis of HUVECs cultured on the surfaces of PVC before and after modification via Cu<sup>II</sup>-GA/CySA coatings after 1, 5 and 7 days of culture. Data presented as mean  $\pm$  SD (n = 4).

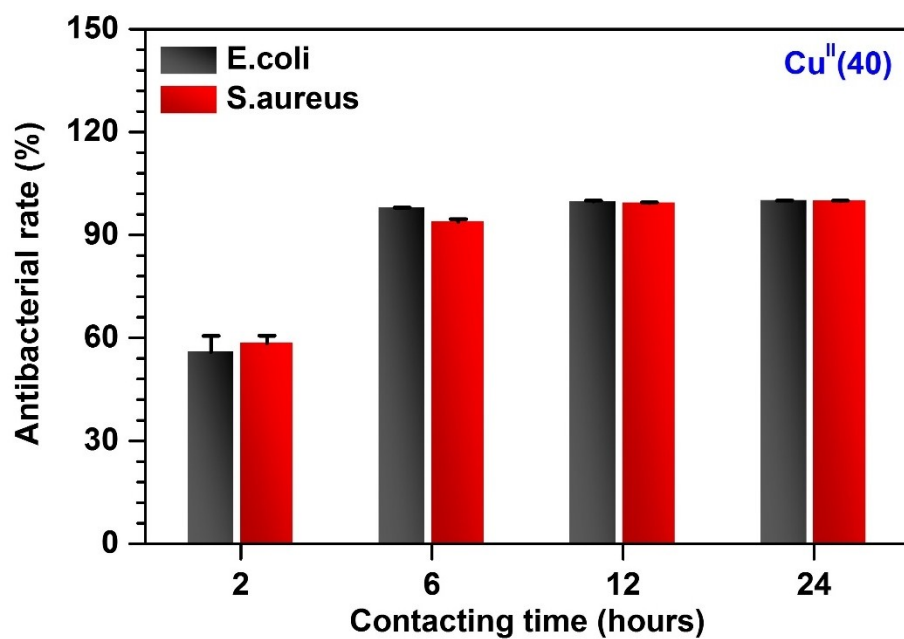

**Fig. S7.** Antibacterial rate of Cu<sup>II</sup>(40) at different contacting durations (detailed values of antibacterial rates are available in **Table S2**).

**Table S1.** Hemolysis ratio of the PVC before and after modification by different Cu<sup>II</sup>-GA/CySA coatings.

| Sample                | Hemolysis ratio (%) |
|-----------------------|---------------------|
| PVC                   | 0.32 ± 0.08         |
| Cu <sup>II</sup> (0)  | 0.34 ± 0.22         |
| Cu <sup>II</sup> (10) | 0.27 ± 0.09         |
| Cu <sup>II</sup> (20) | 0.54 ± 0.17         |
| Cu <sup>II</sup> (40) | 0.72 ± 0.41         |
| Cu <sup>II</sup> (60) | 0.36 ± 0.13         |

**Table S2.** Antibacterial rate of Cu<sup>II</sup>(40) at different contacting durations (%).

|                 | 2 h   | 6 h   | 12 h  | 24 h   |
|-----------------|-------|-------|-------|--------|
| <i>E.coli</i>   | 55.87 | 97.83 | 99.75 | >99.99 |
| <i>S.aureus</i> | 58.43 | 93.82 | 99.29 | 99.88  |
